# Supplementary material for: Nonparametric Interrogation of Transcriptional Regulation in Single-Cell RNA and Chromatin Accessibility Multiomic Data
Source: bioRxiv or medRxiv preprint supplement (doi:10.1101/2021.09.22.461437), 2022-05-12
Supplement: Supplementary file [file media-1.pdf]

## Supplements to “Nonparametric Interrogation of Transcriptional Regulation in Single-Cell RNA and Chromatin Accessibility Multiomic Data”

Yuriko Harigaya<sup>1</sup>, Zhaojun Zhang<sup>2</sup>, Hongpan Zhang<sup>3,4</sup>, Chongzhi Zang<sup>3,4,5</sup>, Nancy R Zhang<sup>2,\*</sup>, Yuchao Jiang<sup>6,7,8,\*</sup>

- <sup>1</sup> Curriculum in Bioinformatics and Computational Biology, School of Medicine, University of North Carolina, Chapel Hill, NC 27599, USA.
- <sup>2</sup> Department of Statistics, The Wharton School, University of Pennsylvania, Philadelphia, PA 19104, USA.
- <sup>3</sup> Center for Public Health Genomics, University of Virginia, Charlottesville, VA 22908, USA.
- <sup>4</sup> Department of Biochemistry and Molecular Genetics, University of Virginia, Charlottesville, VA 22908, USA.
- <sup>5</sup> Department of Public Health Sciences, University of Virginia, Charlottesville, VA 22908, USA.
- <sup>6</sup> Lineberger Comprehensive Cancer Center, University of North Carolina at Chapel Hill, NC 27599, USA.
- <sup>7</sup> Department of Genetics, School of Medicine, University of North Carolina, Chapel Hill, NC 27599, USA.
- <sup>8</sup> Department of Biostatistics, Gillings School of Global Public Health, University of North Carolina, Chapel Hill, NC 27599, USA.

To whom correspondence should be addressed: [nzh@wharton.upenn.edu](mailto:nzh@wharton.upenn.edu), [yuchaoj@email.unc.edu](mailto:yuchaoj@email.unc.edu).

## Supplementary Figures

**Supplementary Fig. 1 | Reduced dimensions for single-cell multiomic datasets.** a-c, UMAP<sup>1</sup> embedding of single cells for the 10X Genomics PBMC, 10X Genomics mouse embryonic brain, and SHARE-seq<sup>2</sup> mouse skin. The three columns show UMAP embedding based on RNA, ATAC, and WNN<sup>3</sup>, respectively, with colors corresponding to transferred/inferred cell types. The last column shows the UMAP embedding overlaid with metacell assignments.

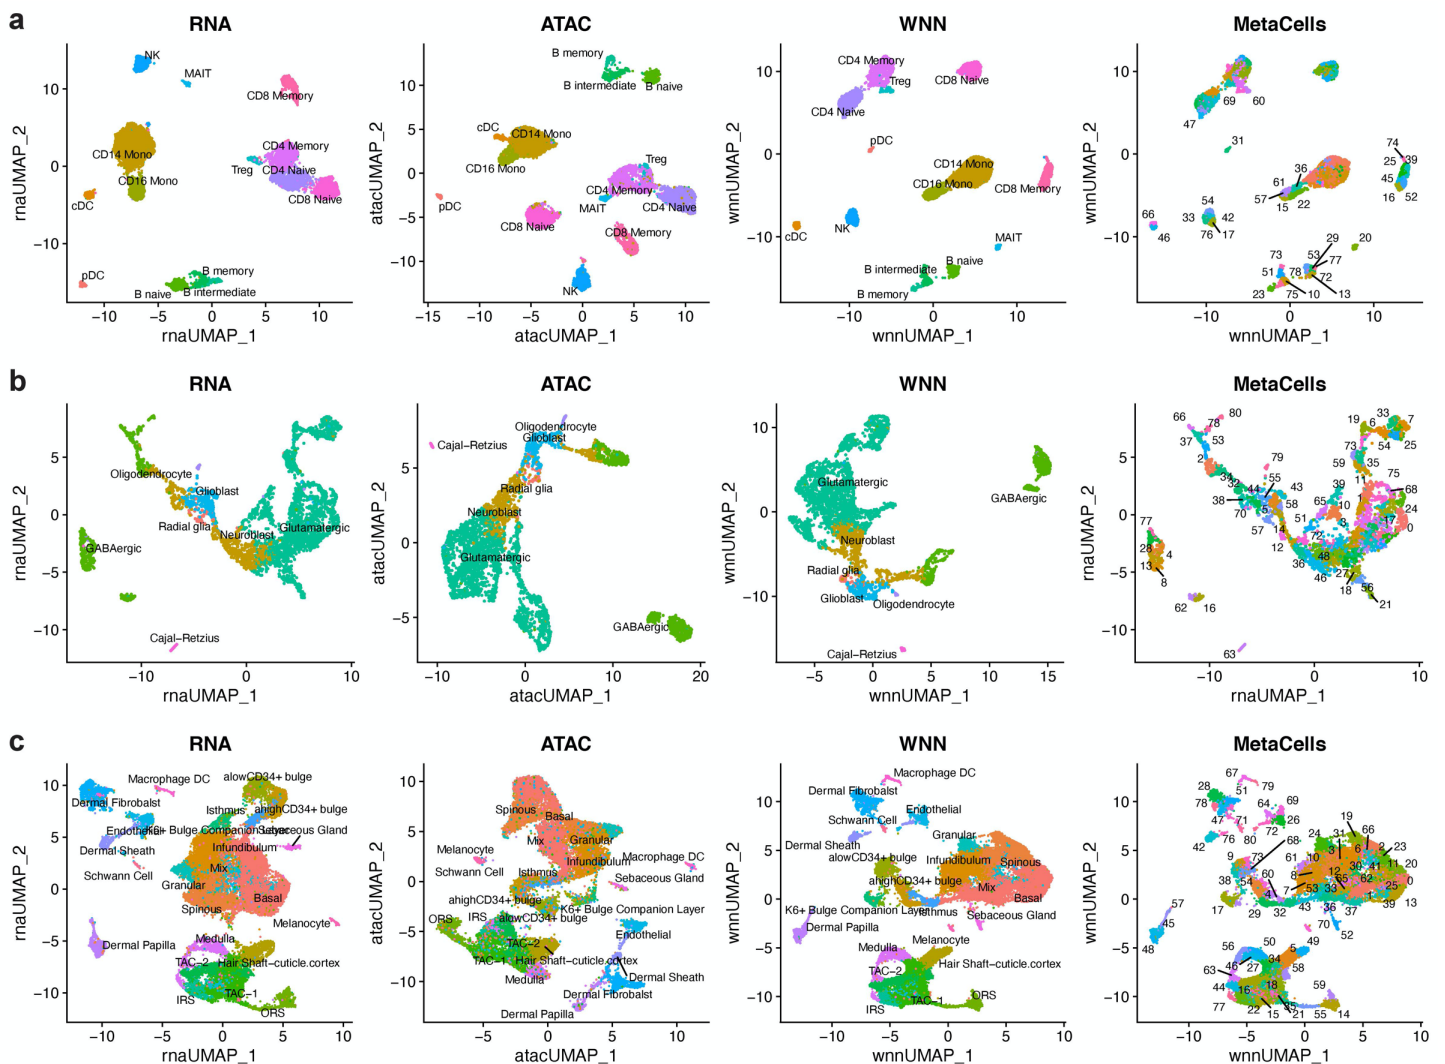

**Supplementary Fig. 2 | Reduced dimensions and RNA prediction for SNARE-seq adult mouse brain data<sup>4</sup>.** **a**, UMAP embedding of single cells based on RNA, ATAC, and WNN, respectively. **b**, Box plots showing distributions of Pearson correlations between observed and predicted RNA expression levels across top 1000 highly variable genes. The horizontal axis represents the sizes of the windows centered at TSSs.

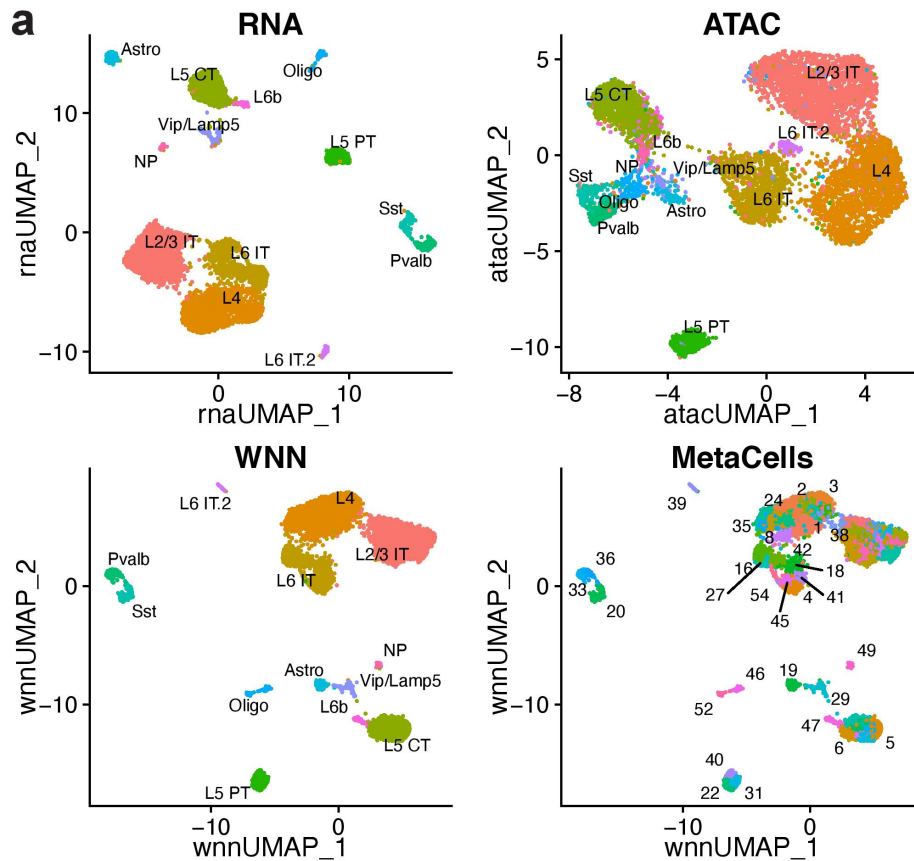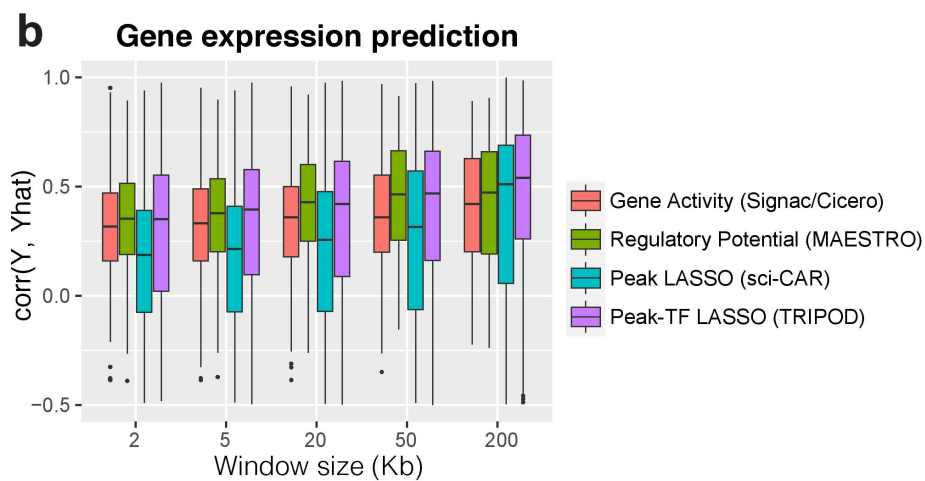

### Supplementary Fig. 3 | RNA prediction using independent training and testing datasets of PBMC.

We trained the supervised prediction model using the dataset of 10k PBMCs, adopted an independent single-cell multiomic dataset of 3k PBMCs as a testing dataset. We merged the two datasets to align genes, peaks, and TFs, and showed that the peak-TF LASSO model significantly increases the prediction accuracy. Distributions of Pearson correlations between observed and predicted RNA expression levels from the testing dataset are shown.

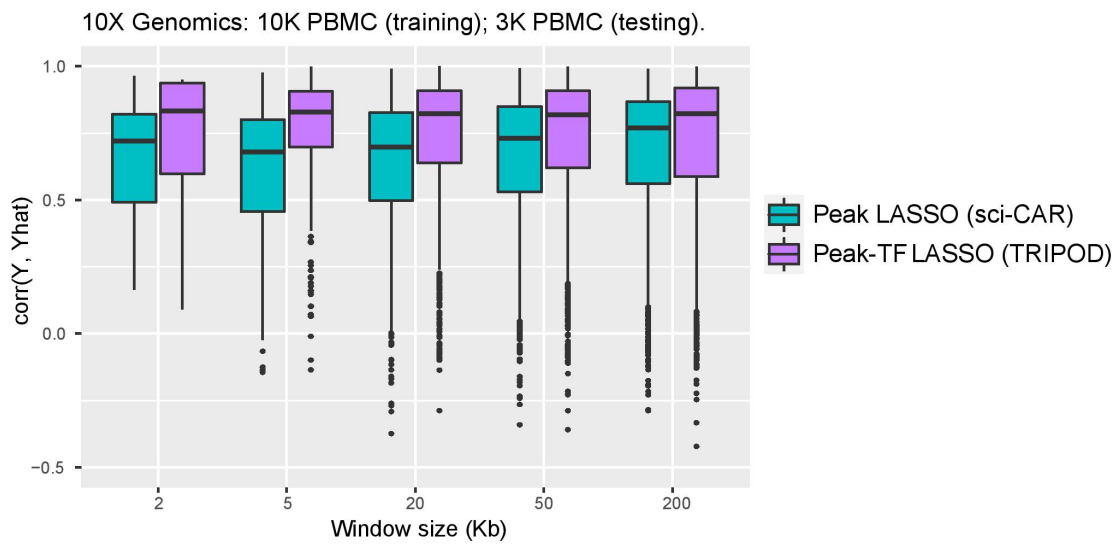

**Supplementary Fig. 4 | RNA and ATAC coverage across different single-cell multiomic sequencing protocols.** TRIPOD was applied to the 10X PBMC, 10X mouse embryonic brain, and SHARE-seq mouse skin data to detect regulatory trios. Data from SNARE-seq<sup>4</sup> and PAIRED-seq<sup>5</sup> suffer from low sequencing depth.

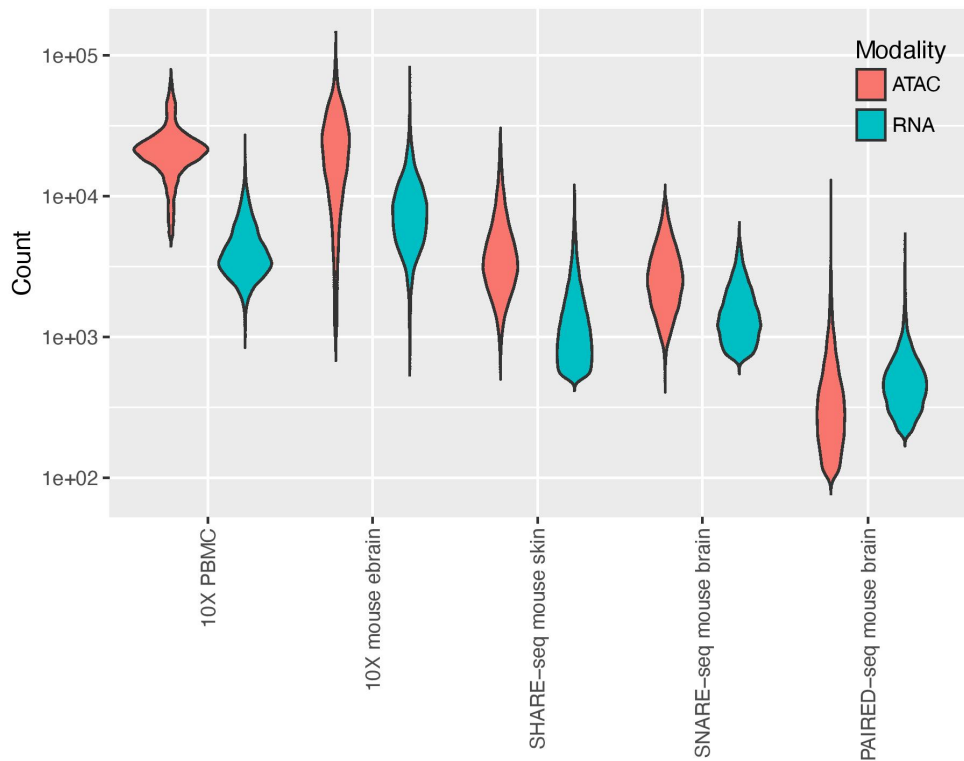

**Supplementary Fig. 5 | Summary statistics of peaks, genes, and motifs in the PBMC data. a,** Histograms of the number of peaks within regions of 100kb/200kb up and downstream of genes' TSSs. **b,** Histograms of the number of genes within regions of 100kb/200kb up and downstream of genes' TSSs. **c,** Histogram of the number of motifs per peak. Of the many possible and biologically meaningful peak-TF-gene combinations, TRIPOD proceeds to scan for trios with significant conditional associations.

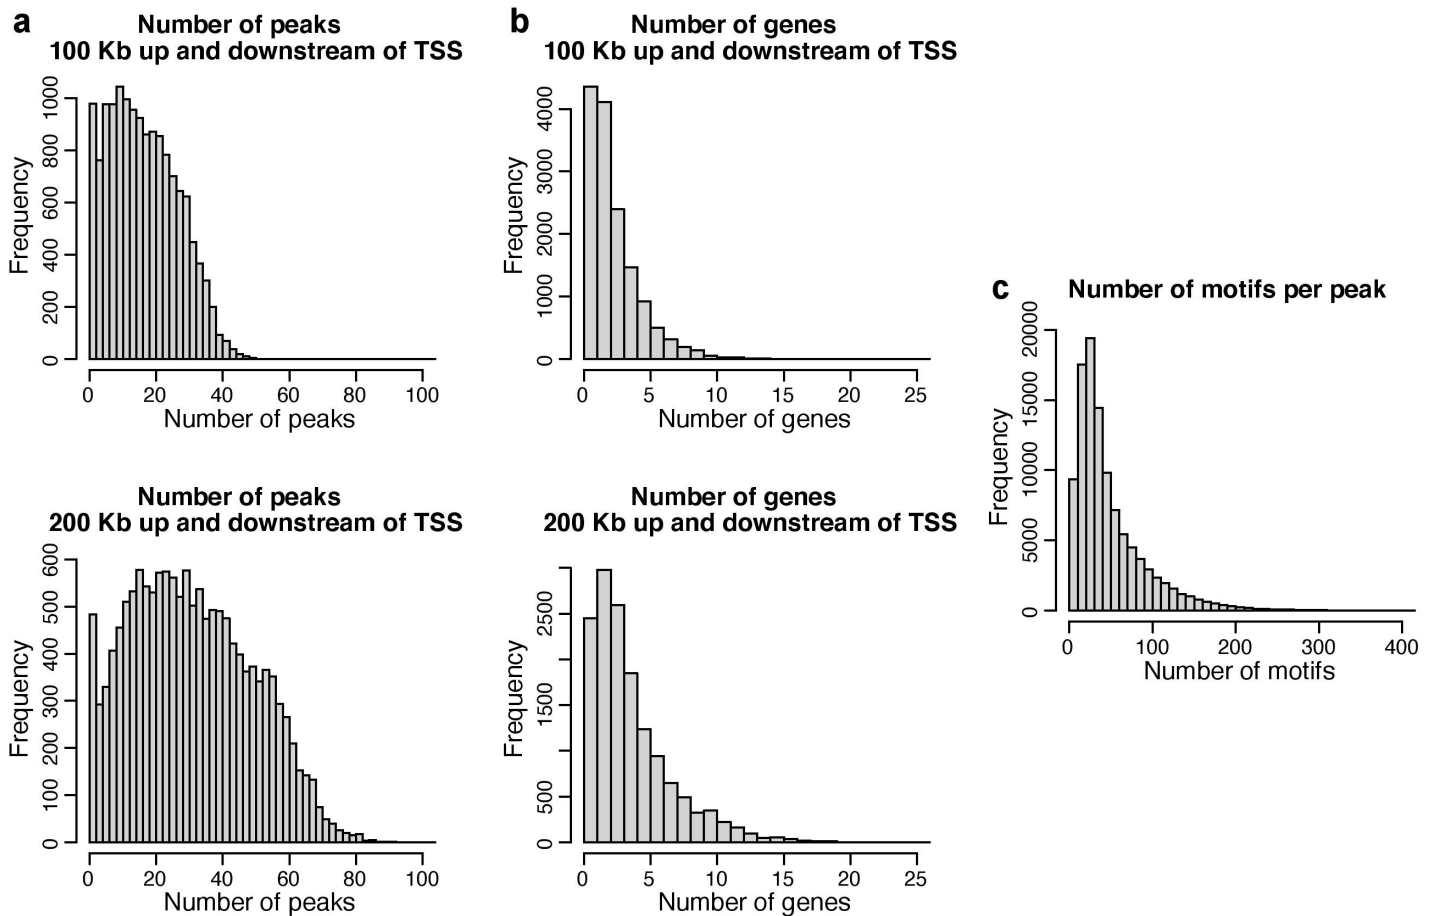

**Supplementary Fig. 6 | Regulatory relationships identified by LinkPeaks, marginal association, and TRIPOD in the PBMC data.** **a**, Venn diagrams of the number of peak-gene pairs captured by LinkPeaks<sup>6</sup>, marginal association between gene expression and peak accessibility, and TRIPOD for representative target genes (*CCR7*, *GNLY*, *FCGR3A*, and *MS4A1*). For TRIPOD, the union set between level 1 and level 2 testing matching by TF expression is shown. **b**, Venn diagrams of the number of TF-gene pairs captured by marginal association between gene expression and TF expression and TRIPOD. For TRIPOD, the union set between level 1 and level 2 testing matching by peak accessibility is shown. TRIPOD complements and contrasts with existing methods based on marginal associations.

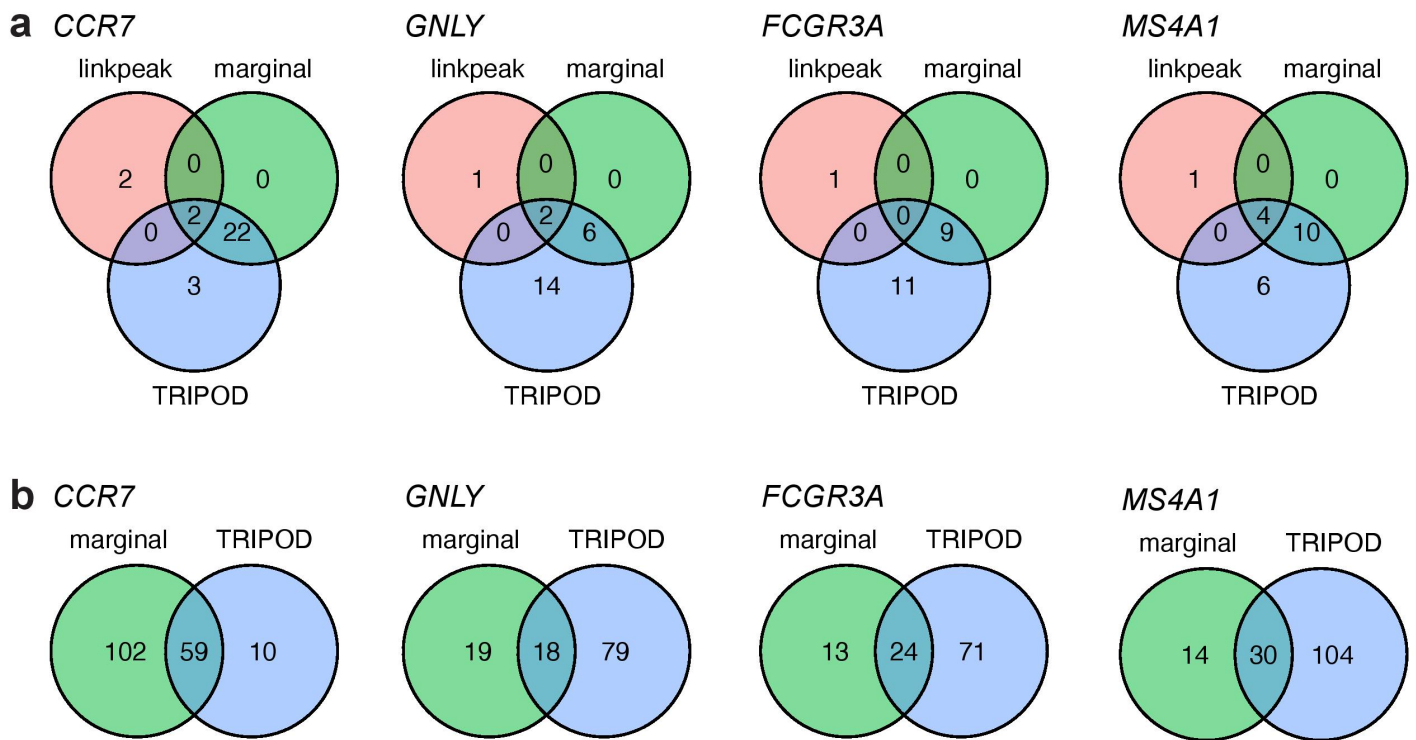

**Supplementary Fig. 7 | Identification of putative cell-type-specific trio regulatory relationships in PBMC.** Results from cell-type-specific influence analyses are shown for the same example trios as in Fig. 3a,b. **a**, Metacell-specific Cook's distance. **b**, Metacell-specific DFFITS. **c**, Cell-type-specific influential  $p$ -values. **d**, Cell-type hierarchies constructed from the RNA domain using highly variable genes. Red/gray circles indicate whether removal of the corresponding branches of metacells significantly changes the model fitting; crosses indicate that removal of the groups of metacells resulted in inestimable coefficients. **e**, Cell-type-specific DNA footprinting signatures of the TF binding motifs. The enrichment results supported the key regulatory cell types identified from the influence analyses.

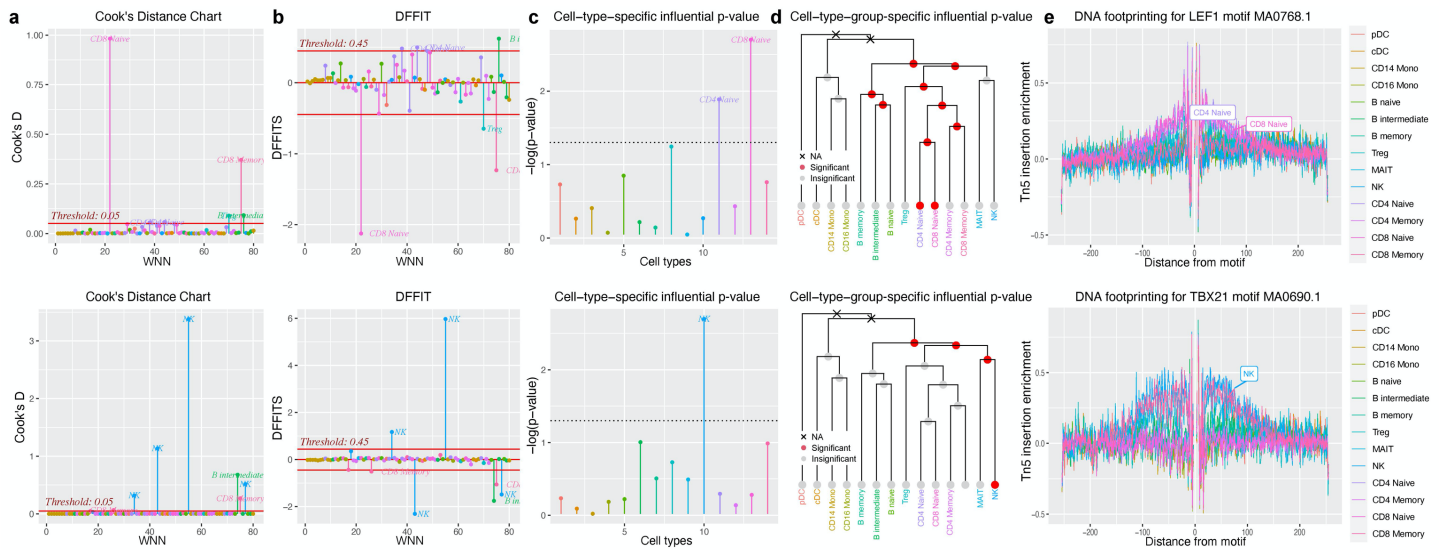



**Supplementary Fig. 8 | Trio regulatory relationships identified by LinkPeaks, marginal association, and TRIPOD, and validation thereof using PLAC-seq data. a**, Bar plots of the numbers of significant regulatory links detected by TRIPOD and marginal associations. The numbers of peak-gene pairs and TF-gene pairs were obtained by collapsing trios by TFs and peaks, respectively. **b**, Heatmap showing the degree of enrichment of ATAC peaks in enhancer-promoter contacts by PLAC-seq<sup>5</sup>. **c**, Venn diagrams of the number of peak-gene pairs captured by PLAC-seq, marginal association between gene expression and peak accessibility, and various models as indicated on the top of each diagram.

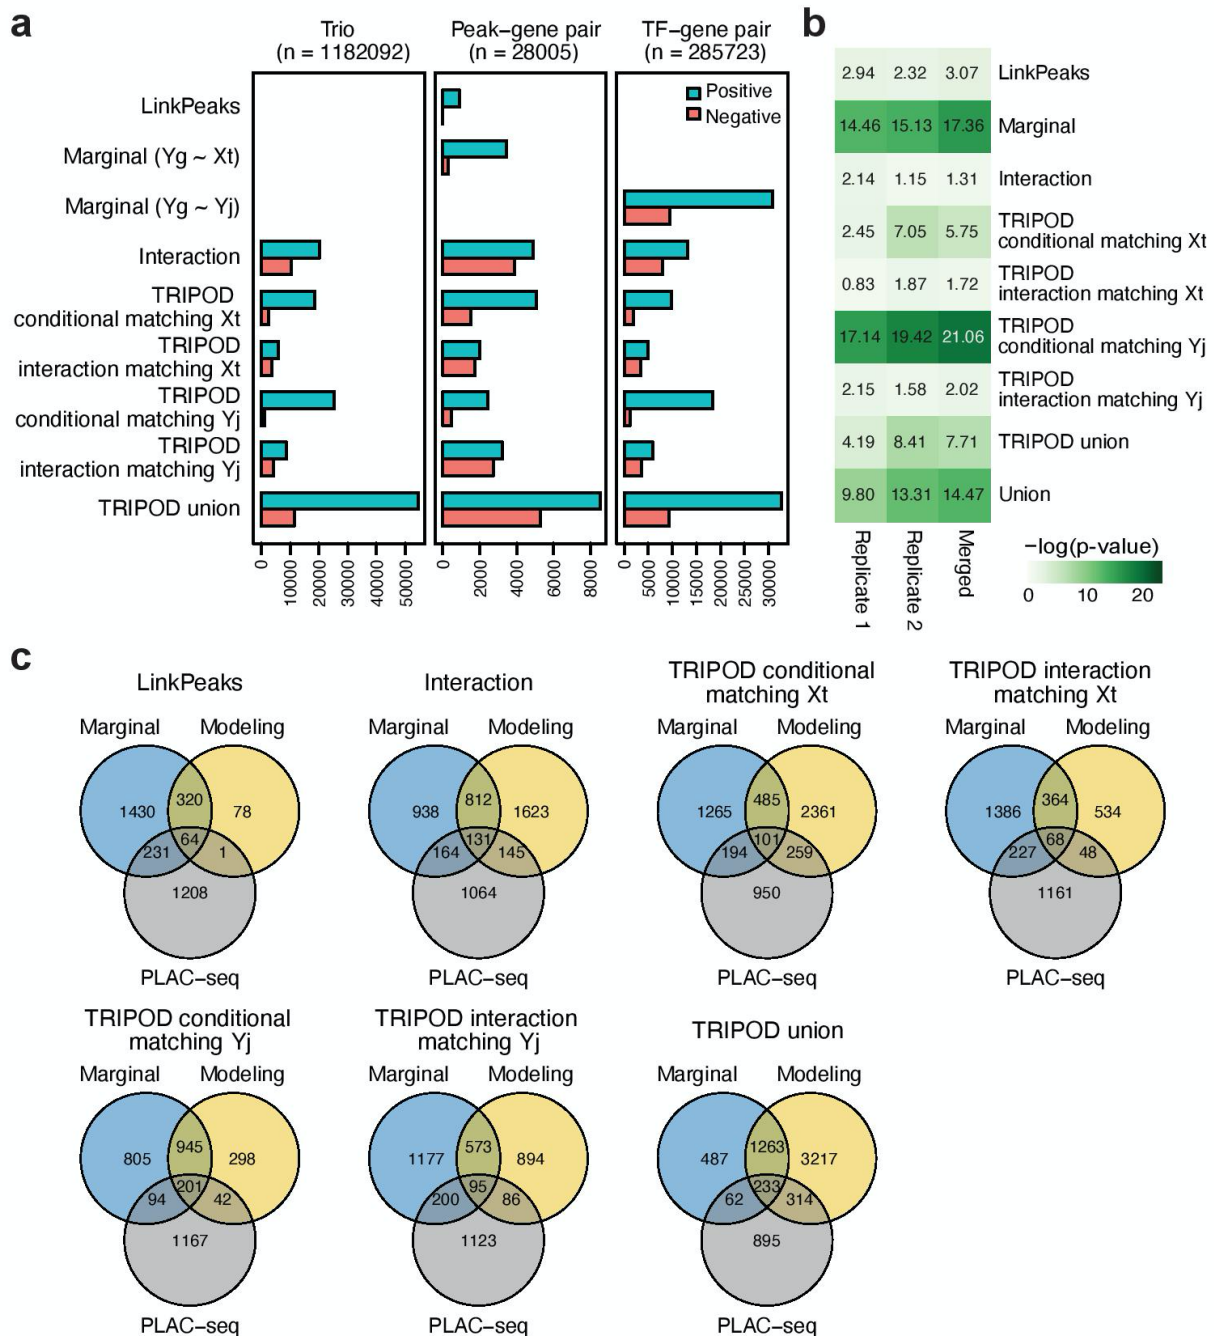

**Supplementary Fig. 9 | Visualization of regulatory links representing possible crosstalks between neurogenesis- and gliogenesis-specific TF cascades. a, Putative regulation of *Nfia* by Neurog2, Eomes, and Tbr1. b, Putative regulation of *Sox9* by Neurog2. ChIP-seq peaks for the indicated TFs are included; arcs represent significant regulatory links inferred by TRIPOD.**

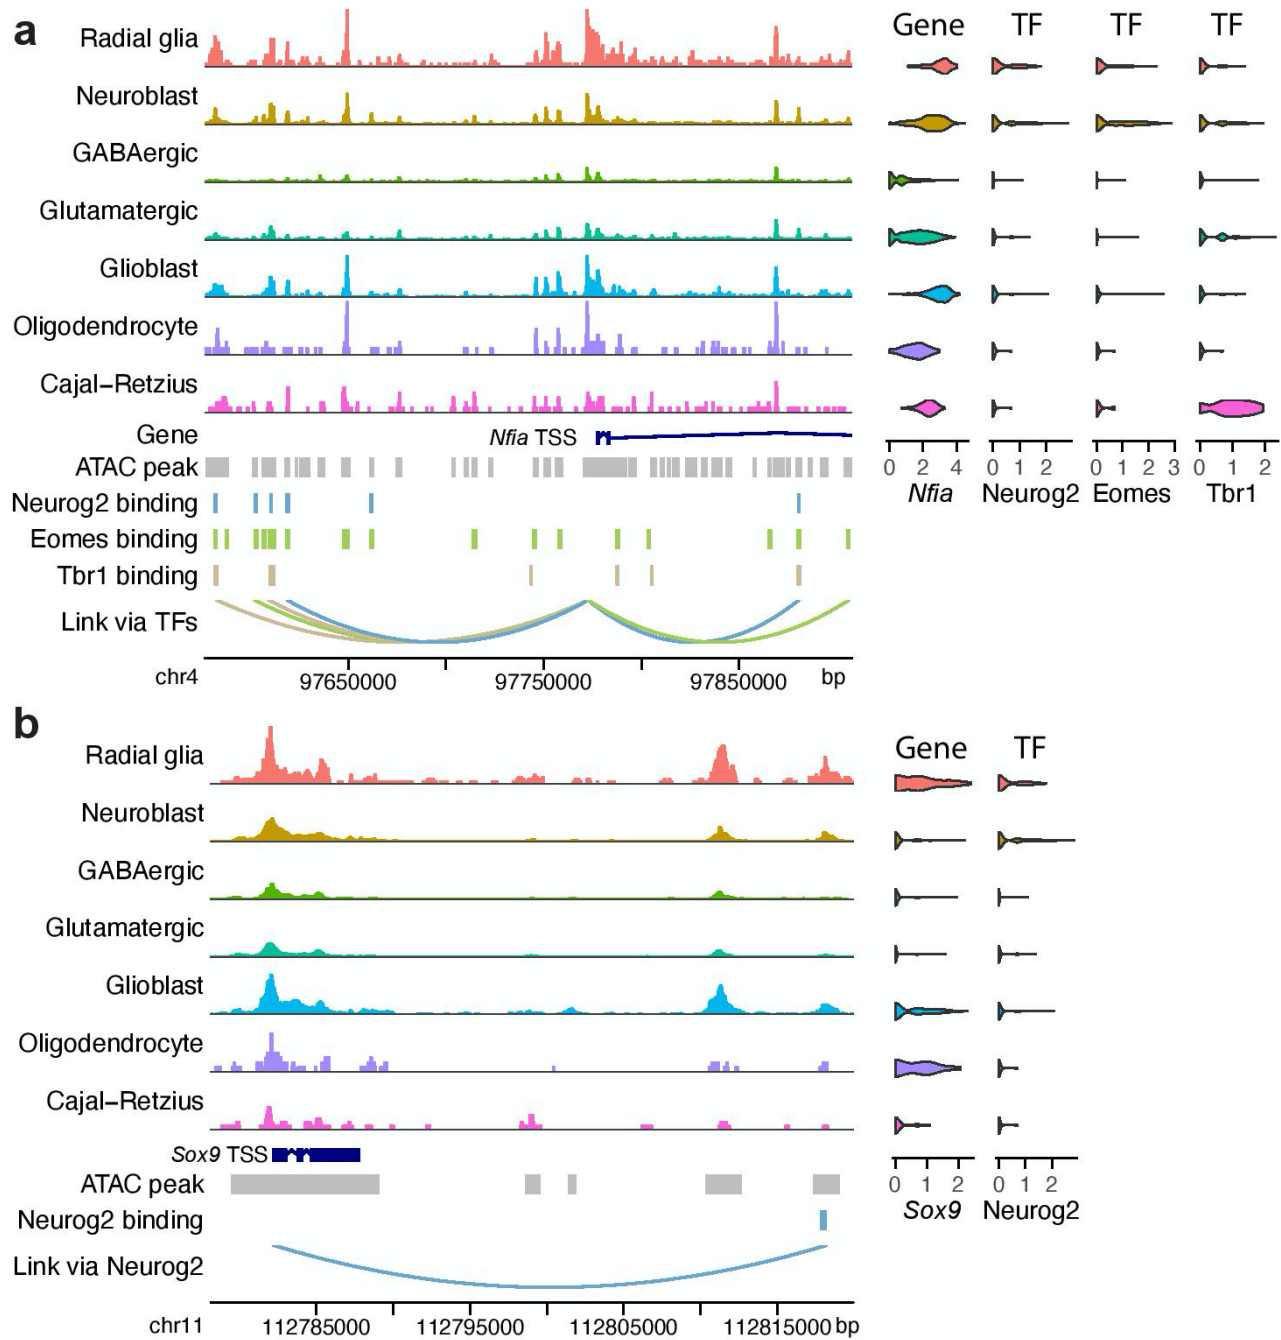

**Supplementary Fig. 10 | Identification of putative cell-type- and cell-state-specific regulation in mouse embryonic brain.** **a-h**, Visualization of eight example trios from the neurogenesis and gliogenesis TF cascades. The scatter plots (left) show TRIPOD's modeling fitting; the points represent metacells and are colored based on cell types. The middle panels show cell-type-specific  $p$ -values from the sampling-based influence analyses. The colors on the UMAP embedding (right) correspond to the smoothed  $p$ -values from the sampling-based influence analyses along the differentiation trajectory. Genomic coordinates for the peaks are from mm10.

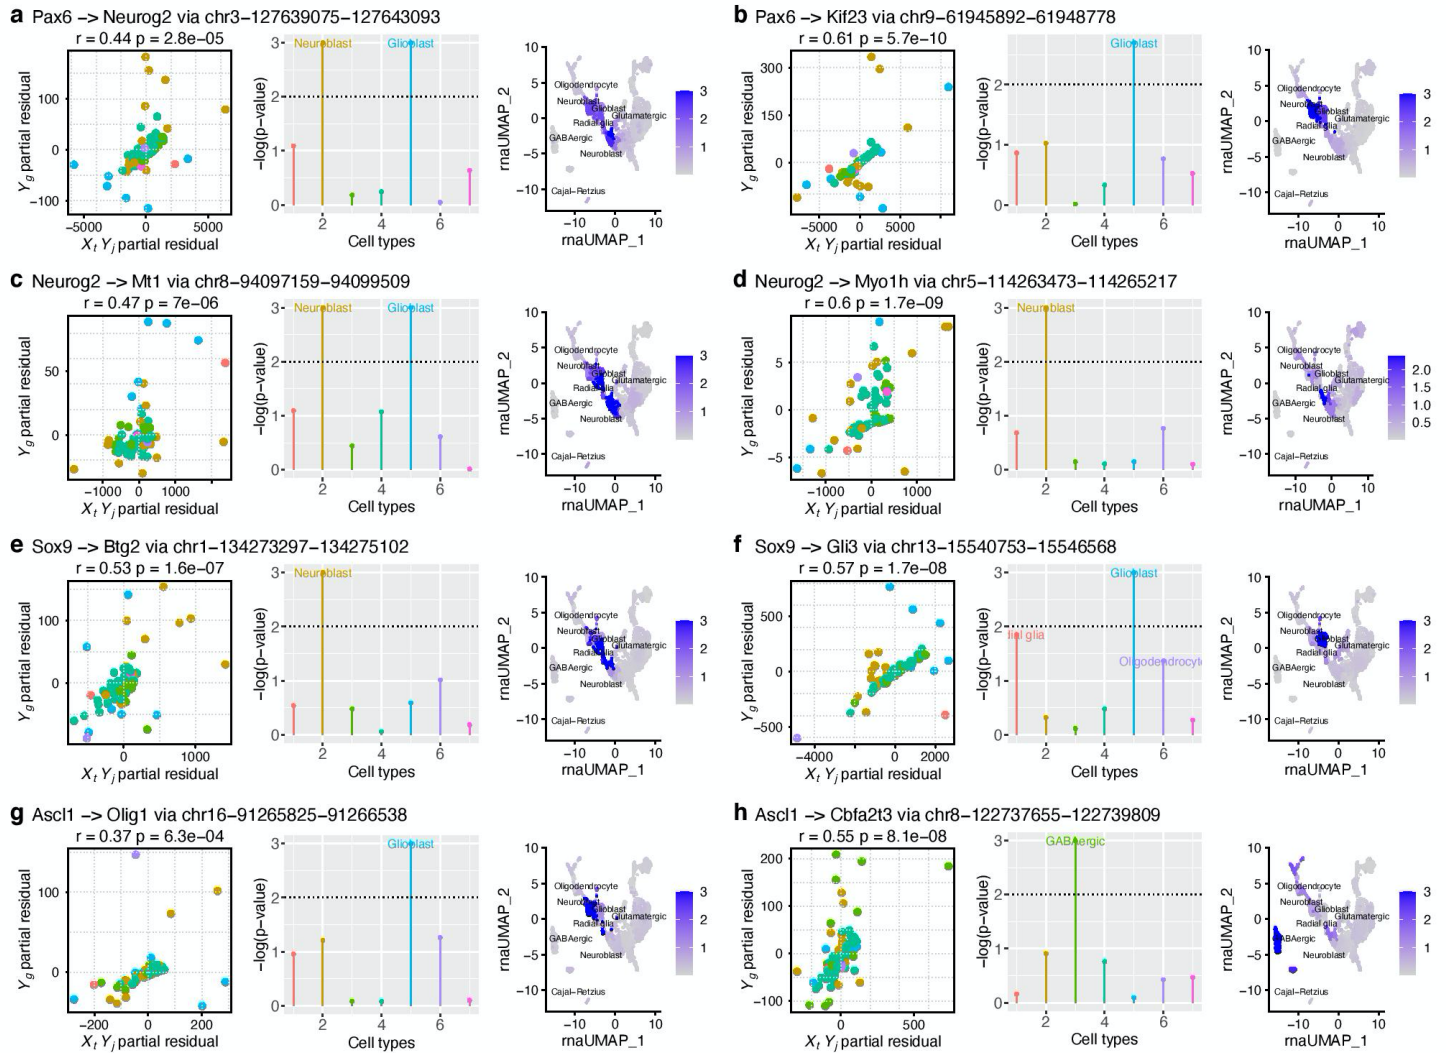

**Supplementary Fig. 11 | Assessing linear models for detecting conditional associations.** Scatter plots comparing fittings from linear models and TRIPOD's level 1 and level 2 testing for example trios in **a**, PBMC and **b**, mouse skin. Genomic coordinates for the peaks are from hg38 for human and mm10 for mouse.

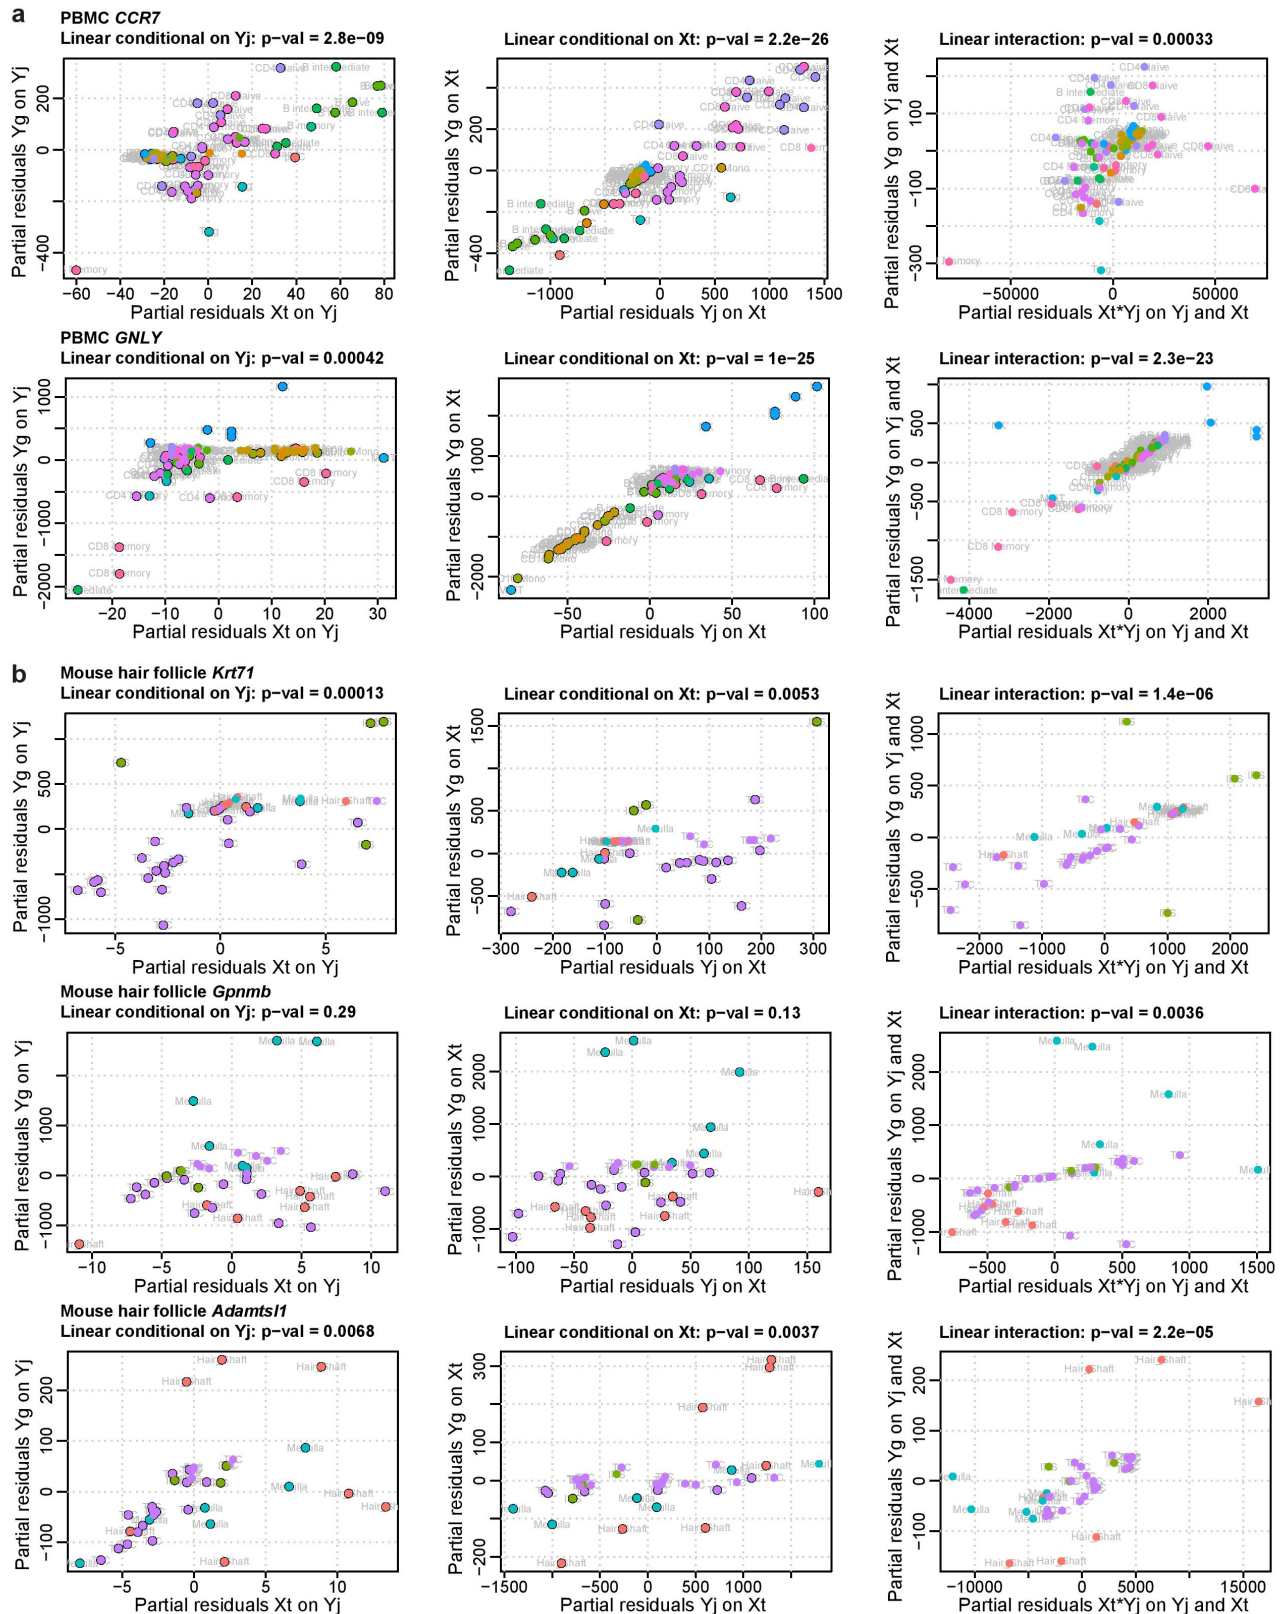

**Supplementary Fig. 12 | Comparison of estimated coefficients from linear model and TRIPOD'S nonparametric model.** a-d, Pairwise scatter plots comparing transformed coefficients from linear model and TRIPOD'S nonparametric model for representative target genes, *CCR7*, *GNLY*, *FCGR3A*, and *MS4A1* from the PBMC data.  $\gamma$  denotes the coefficient for the interaction between TF expression and peak accessibility;  $\alpha$  and  $\beta$  denote the coefficients for the partial gene-peak and gene-TF correlations, respectively. The three coefficients are fit using the linear model and TRIPOD'S level 1 and level 2 testing, and their estimates are correlated on the global scale. However, the actual call sets are different, and the underlying models and assumptions are different.

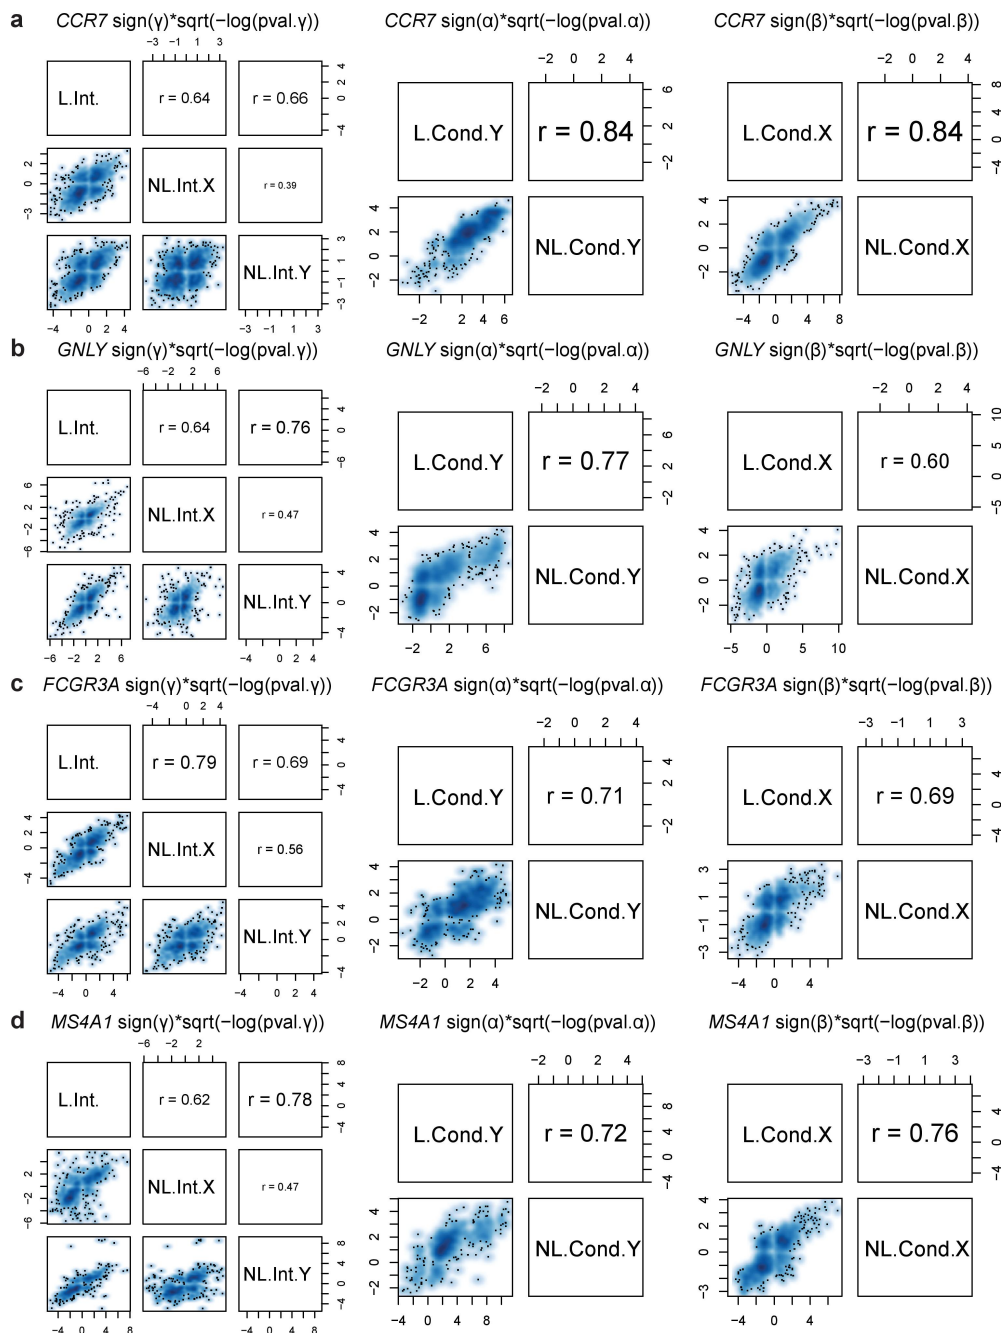

**Supplementary Fig. 13 | Comparison of the trio regulatory relationships identified by linear model and TRIPOD's nonparametric model. a-d**, Venn diagrams of the number of significant trios detected by linear and TRIPOD models for representative target genes, *CCR7*, *GNLY*, *FCGR3A*, and *MS4A1*. The left, middle, and right panels contain results from the interaction models, the models conditional on TF expression  $Y_j$ , and the models conditional on peak accessibility  $X_t$ . L.int., TRIPOD.Int.Y, TRIPOD.Int.X, L.Cond.Y, TRIPOD.Cond.Y, L.Cond.X, and TRIPOD.Cond.X represent linear interaction model, nonparametric interaction model matching by TF expression (TRIPOD level 2 test), nonparametric interaction model matching by peak accessibility (TRIPOD level 2 test), linear model conditional on TF expression, nonparametric conditional model matching by TF expression (TRIPOD level 1 test), linear model conditional on peak accessibility, and nonparametric conditional model matching by peak accessibility (TRIPOD level 1 test), respectively.

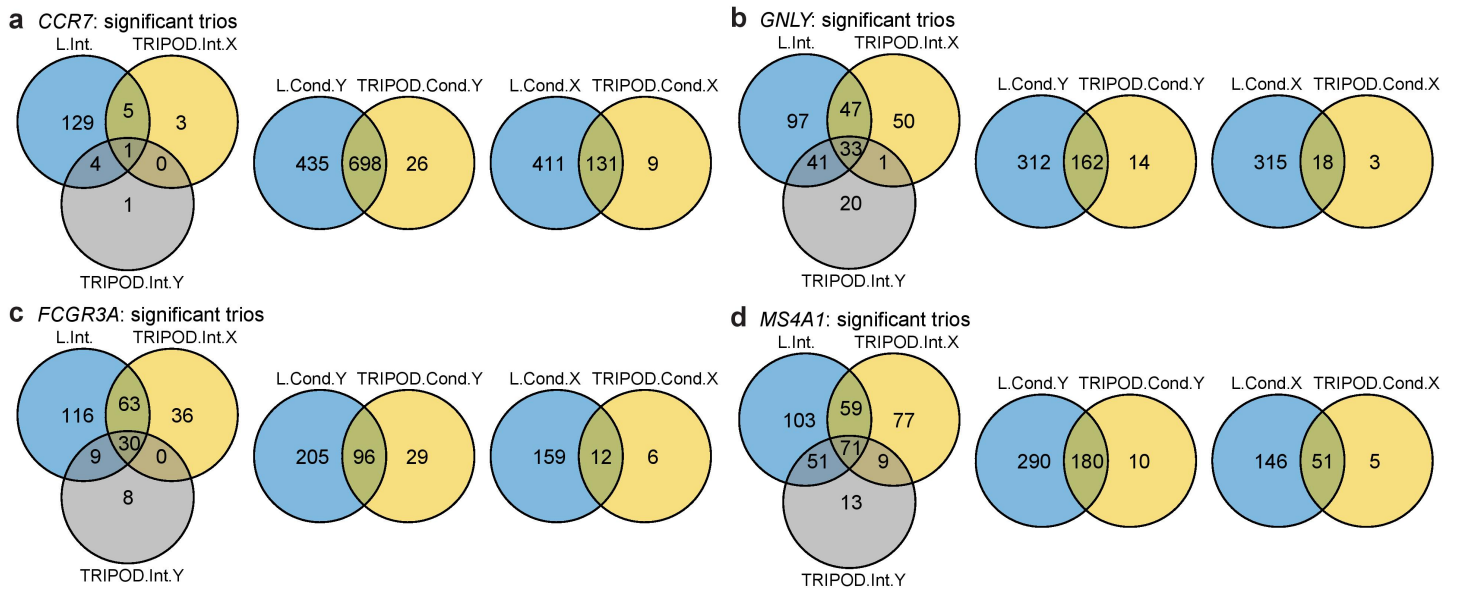

## Supplementary Tables

**Supplementary Table 1 | Single-cell RNA and ATAC multiomic datasets.** Data adopted in this study from different tissues, organisms, and cell types using different protocols are summarized. The number of cells, peaks, and genes, as well as RNA read counts and ATAC read counts **a**, before and **b**, after quality control (QC) are summarized. Sources of data are also provided.

(A)

| Organism            | Tissue                      | Protocol              | PMID or source | Before QC       |                 |                 |                |               |
|---------------------|-----------------------------|-----------------------|----------------|-----------------|-----------------|-----------------|----------------|---------------|
|                     |                             |                       |                | Number of cells | Number of peaks | Number of genes | Mean cov. ATAC | Mean cov. RNA |
| <i>Homo sapiens</i> | PBMC                        | 10X Genomics Multiome | 10X Genomics   | 11909           | 108377          | 36601           | 20434          | 4402          |
| <i>Homo sapiens</i> | PBMC                        | 10X Genomics Multiome | 10X Genomics   | 2714            | 156607          | 36601           | 20661          | 4344          |
| <i>Mus musculus</i> | Embryonic brain at day 18   | 10X Genomics Multiome | 10X Genomics   | 4881            | 139083          | 32285           | 20989          | 9486          |
| <i>Mus musculus</i> | Skin late anagen            | SHARE-seq             | 33098772       | 34774           | 344592          | 23296           | 4231           | 1259          |
| <i>Mus musculus</i> | Adult brain cerebral cortex | SNARE-seq             | 31611697       | 10309           | 244544          | 33160           | 2656           | 1549          |
| <i>Mus musculus</i> | Adult brain cerebral cortex | PAIRED-seq            | 31695190       | 15191           | 2614863         | 29624           | 1600           | 459           |

(B)

| Organism            | Tissue                      | Protocol              | PMID or source | After QC        |                 |                 |                |               |
|---------------------|-----------------------------|-----------------------|----------------|-----------------|-----------------|-----------------|----------------|---------------|
|                     |                             |                       |                | Number of cells | Number of peaks | Number of genes | Mean cov. ATAC | Mean cov. RNA |
| <i>Homo sapiens</i> | PBMC                        | 10X Genomics Multiome | 10X Genomics   | 7790            | 103755          | 14508           | 9611           | 3352          |
| <i>Homo sapiens</i> | PBMC                        | 10X Genomics Multiome | 10X Genomics   | 2206            | 106056          | 36601           | 13534          | 4425          |
| <i>Mus musculus</i> | Embryonic brain at day 18   | 10X Genomics Multiome | 10X Genomics   | 3962            | 139083          | 14476           | 12520          | 8293          |
| <i>Mus musculus</i> | Skin late anagen            | SHARE-seq             | 33098772       | 29308           | 343783          | 15086           | 17886          | 1080          |
| <i>Mus musculus</i> | Adult brain cerebral cortex | SNARE-seq             | 31611697       | 7533            | 244544          | 15332           | 12534          | 2053          |
| <i>Mus musculus</i> | Adult brain cerebral cortex | PAIRED-seq            | 31695190       | 11292           | 118337          | 17858           | 3014           | 387           |

**Supplementary Table 2 | ChIP-seq data of human blood (B lymphocyte, T lymphocyte, and monocyte).** Non-cancerous and cell-type-specific ChIP-seq data of human blood were downloaded from the Cistrome<sup>7</sup> portal to validate the peak-TF links in the PBMC single-cell multiomic data. PCR bottleneck coefficient (PBC) is used to estimate the rate of read duplication through PCR amplification; a good PBC score is  $\geq 80\%$ . PeaksFoldChangeAbove10 contains the number of peaks called by MACS2<sup>8</sup> with a fold change above 10. FRiP is used for evaluating the signal-to-noise ratio; a good FRiP score is  $\geq 1\%$ . PeaksUnionDHSRatio is the percentage of the merged top 5000 peaks (ordered by MACS2 *q*-value) that overlap with union DHS regions; this is expected to be  $\geq 70\%$ .

| DCid  | Species      | GSMID      | Factor  | Cell_line | Cell_type    | Tissue_type | FastQC | UniquelyMappedRatio | PBC   | PeaksFoldChangeAbove10 | FRiP        | PeaksUnionDHSRatio |
|-------|--------------|------------|---------|-----------|--------------|-------------|--------|---------------------|-------|------------------------|-------------|--------------------|
| 40022 | Homo sapiens | GSM1121094 | BRD4    | None      | B Lymphocyte | Blood       | 38     | 0.8193              | 0.955 | 1615                   | 0.1565535   | 0.9436             |
| 40053 | Homo sapiens | GSM1121098 | CDK7    | None      | B Lymphocyte | Blood       | 38     | 0.7267              | 0.962 | 1230                   | 0.05939275  | 0.9608             |
| 40226 | Homo sapiens | GSM1195559 | CDK9    | None      | B Lymphocyte | Blood       | 38     | 0.7745              | 0.937 | 4517                   | 0.09261     | 0.9696             |
| 45178 | Homo sapiens | GSM1003474 | CTCF    | None      | B Lymphocyte | Blood       | 38     | 0.7908              | 0.904 | 27265                  | 0.305596    | 0.9758             |
| 45179 | Homo sapiens | GSM1003476 | H2AZ    | None      | B Lymphocyte | Blood       | 37     | 0.7298              | 0.94  | 2524                   | 0.1956965   | 0.975              |
| 40215 | Homo sapiens | GSM1195560 | IRF4    | None      | B Lymphocyte | Blood       | 38     | 0.8383              | 0.948 | 8535                   | 0.13387325  | 0.9422             |
| 40216 | Homo sapiens | GSM1195557 | MED1    | None      | B Lymphocyte | Blood       | 38     | 0.5248              | 0.844 | 4058                   | 0.14310625  | 0.9664             |
| 40233 | Homo sapiens | GSM1195555 | MED1    | None      | B Lymphocyte | Blood       | 38     | 0.6613              | 0.911 | 9273                   | 0.2180545   | 0.954              |
| 40234 | Homo sapiens | GSM1195556 | MED1    | None      | B Lymphocyte | Blood       | 38     | 0.8217              | 0.963 | 4479                   | 0.1278495   | 0.9472             |
| 5967  | Homo sapiens | GSM762709  | MYC     | None      | B Lymphocyte | Blood       | 29     | 0.7391              | 0.988 | 1211                   | 0.048873002 | 0.9576             |
| 33439 | Homo sapiens | GSM971344  | POLR2A  | None      | B Lymphocyte | Blood       | 30     | 0.7135              | 0.922 | 4948                   | 0.1402875   | 0.9746             |
| 33434 | Homo sapiens | GSM971343  | SMARCA4 | None      | B Lymphocyte | Blood       | 30     | 0.6431              | 0.909 | 2353                   | 0.0451365   | 0.964              |
| 45444 | Homo sapiens | GSM1003508 | CTCF    | None      | Monocyte     | Blood       | 37     | 0.7086              | 0.948 | 23384                  | 0.243658    | 0.9718             |
| 45441 | Homo sapiens | GSM1003548 | H2AZ    | None      | Monocyte     | Blood       | 37     | 0.8274              | 0.898 | 1674                   | 0.11932275  | 0.975              |
| 41301 | Homo sapiens | GSM1057025 | IRF1    | None      | Monocyte     | Blood       | 38     | 0.8155              | 0.932 | 11224                  | 0.07846625  | 0.9264             |
| 41302 | Homo sapiens | GSM1057026 | IRF1    | None      | Monocyte     | Blood       | 38     | 0.8212              | 0.943 | 3018                   | 0.028401    | 0.945              |
| 41303 | Homo sapiens | GSM1057027 | IRF1    | None      | Monocyte     | Blood       | 38     | 0.8198              | 0.877 | 5920                   | 0.04798775  | 0.9316             |
| 81223 | Homo sapiens | GSM2687534 | RUNX1   | None      | Monocyte     | Blood       | 38     | 0.7012              | 0.919 | 9496                   | 0.31398225  | 0.9418             |
| 85986 | Homo sapiens | GSM2804465 | SPI1    | None      | Monocyte     | Blood       | 39     | 0.7064              | 0.944 | 1283                   | 0.038436584 | 0.9426             |
| 41287 | Homo sapiens | GSM1057011 | STAT1   | None      | Monocyte     | Blood       | 39     | 0.8088              | 0.993 | 6006                   | 0.11584575  | 0.976              |
| 41288 | Homo sapiens | GSM1057012 | STAT1   | None      | Monocyte     | Blood       | 39     | 0.7591              | 0.995 | 1501                   | 0.0587395   | 0.9728             |
| 41289 | Homo sapiens | GSM1057013 | STAT1   | None      | Monocyte     | Blood       | 39     | 0.8118              | 0.993 | 11395                  | 0.15686975  | 0.9774             |
| 82662 | Homo sapiens | GSM2679938 | T       | None      | Monocyte     | Blood       | 39     | 0.8392              | 0.992 | 11428                  | 0.14325775  | 0.9586             |
| 81224 | Homo sapiens | GSM2687535 | TET2    | None      | Monocyte     | Blood       | 38     | 0.6452              | 0.79  | 2851                   | 0.22890725  | 0.7862             |
| 36301 | Homo sapiens | GSM823379  | BRD4    | None      | T Lymphocyte | Blood       | 39     | 0.6184              | 0.803 | 1025                   | 0.02953575  | 0.9652             |
| 38389 | Homo sapiens | GSM1022944 | BRD4    | None      | T Lymphocyte | Blood       | 38     | 0.7591              | 0.968 | 1092                   | 0.04322775  | 0.9644             |
| 3060  | Homo sapiens | GSM325895  | CTCF    | None      | T Lymphocyte | Blood       | 29     | 0.5214              | 0.902 | 15633                  | 0.253560996 | 0.9716             |
| 44090 | Homo sapiens | GSM1056928 | ETS1    | None      | T Lymphocyte | Blood       | 37     | 0.5843              | 0.965 | 1319                   | 0.0132305   | 0.96               |
| 44092 | Homo sapiens | GSM1056930 | ETS1    | None      | T Lymphocyte | Blood       | 39     | 0.803               | 0.909 | 3052                   | 0.0402015   | 0.9594             |
| 44093 | Homo sapiens | GSM1056931 | ETS1    | None      | T Lymphocyte | Blood       | 38     | 0.7048              | 0.905 | 1559                   | 0.02145925  | 0.956              |
| 44094 | Homo sapiens | GSM1056932 | ETS1    | None      | T Lymphocyte | Blood       | 39     | 0.7582              | 0.903 | 2587                   | 0.039202    | 0.9608             |
| 4459  | Homo sapiens | GSM393968  | POLR2A  | None      | T Lymphocyte | Blood       | 27     | 0.5922              | 0.982 | 3068                   | 0.04810575  | 0.972              |
| 36302 | Homo sapiens | GSM823380  | POLR2A  | None      | T Lymphocyte | Blood       | 39     | 0.7371              | 0.8   | 10180                  | 0.2364385   | 0.9728             |
| 38342 | Homo sapiens | GSM1022949 | POLR2A  | None      | T Lymphocyte | Blood       | 39     | 0.736               | 0.968 | 5581                   | 0.08956125  | 0.973              |
| 38361 | Homo sapiens | GSM1022946 | POLR2A  | None      | T Lymphocyte | Blood       | 38     | 0.7341              | 0.964 | 6984                   | 0.1400275   | 0.975              |
| 38431 | Homo sapiens | GSM1022950 | POLR2A  | None      | T Lymphocyte | Blood       | 39     | 0.7477              | 0.97  | 6222                   | 0.09659675  | 0.971              |
| 38433 | Homo sapiens | GSM1022948 | POLR2A  | None      | T Lymphocyte | Blood       | 39     | 0.7713              | 0.974 | 1407                   | 0.03362775  | 0.9644             |
| 38454 | Homo sapiens | GSM1022945 | POLR2A  | None      | T Lymphocyte | Blood       | 39     | 0.7491              | 0.957 | 5196                   | 0.079669    | 0.9732             |
| 47435 | Homo sapiens | GSM1201946 | REST    | None      | T Lymphocyte | Blood       | 37     | 0.6073              | 0.886 | 1840                   | 0.0628475   | 0.916              |
| 44097 | Homo sapiens | GSM1056935 | RUNX1   | None      | T Lymphocyte | Blood       | 39     | 0.7136              | 0.886 | 1187                   | 0.0181065   | 0.9504             |
| 53629 | Homo sapiens | GSM1577746 | STAT5B  | None      | T Lymphocyte | Blood       | 37     | 0.7536              | 0.767 | 8377                   | 0.1459865   | 0.95               |
| 53630 | Homo sapiens | GSM1577747 | STAT5B  | None      | T Lymphocyte | Blood       | 37     | 0.7297              | 0.708 | 8462                   | 0.1848495   | 0.9604             |
| 53631 | Homo sapiens | GSM1577748 | STAT5B  | None      | T Lymphocyte | Blood       | 38     | 0.6881              | 0.676 | 2727                   | 0.07564975  | 0.804              |
| 5195  | Homo sapiens | GSM630810  | YY1     | None      | T Lymphocyte | Blood       | 20     | 0.5189              | 0.783 | 3788                   | 0.119051698 | 0.9708             |



## References

1. Becht, E. et al. Dimensionality reduction for visualizing single-cell data using UMAP. *Nat Biotechnol* (2018).
2. Ma, S. et al. Chromatin Potential Identified by Shared Single-Cell Profiling of RNA and Chromatin. *Cell* **183**, 1103-1116 e1120 (2020).
3. Hao, Y. et al. Integrated analysis of multimodal single-cell data. *Cell* **184**, 3573-3587 e3529 (2021).
4. Chen, S., Lake, B.B. & Zhang, K. High-throughput sequencing of the transcriptome and chromatin accessibility in the same cell. *Nat Biotechnol* **37**, 1452-1457 (2019).
5. Zhu, C. et al. An ultra high-throughput method for single-cell joint analysis of open chromatin and transcriptome. *Nat Struct Mol Biol* **26**, 1063-1070 (2019).
6. Stuart, T., Srivastava, A., Lareau, C. & Satija, R. Multimodal single-cell chromatin analysis with Signac. *bioRxiv*, 2020.2011.2009.373613 (2020).
7. Mei, S. et al. Cistrome Data Browser: a data portal for ChIP-Seq and chromatin accessibility data in human and mouse. *Nucleic Acids Res* **45**, D658-D662 (2017).
8. Zhang, Y. et al. Model-based analysis of ChIP-Seq (MACS). *Genome Biol* **9**, R137 (2008).
